# Supplementary material
Source: PubMed Central journal article supplement (PMC6340102)
Supplement: NIHMS1006184-supplement-1.pdf [file NIHMS1006184-supplement-1.pdf]

Supplemental Table I. Up-regulated differentially expressed viral response gene sets in earlier-onset diverticulitis patients.

| Gene Set                                        | Combined Score | <i>P</i> -value | <i>q</i> -value |
|-------------------------------------------------|----------------|-----------------|-----------------|
| GO:0039696 RNA-Templated Viral Transcription    | 220.9          | 1.25E-32        | 3.88E-30        |
| GO:0019084 Middle Viral Transcription           | 220.7          | 1.25E-32        | 3.88E-30        |
| GO:0039695 DNA-Templated Viral Transcription    | 220.5          | 1.25E-32        | 3.88E-30        |
| GO:0019085 Early Viral Transcription            | 219.8          | 3.98E-32        | 1.18E-29        |
| GO:0075527 Viral RNA Editing                    | 210.9          | 5.02E-30        | 1.30E-27        |
| GO:0019083 Viral Transcription                  | 210.7          | 5.02E-30        | 1.30E-27        |
| GO:0019062 Virion Attachment to Host Cell       | 26.5           | 3.60E-05        | 2.40E-03        |
| GO:0046718 Viral Entry into Host Cell           | 24.5           | 6.40E-05        | 3.90E-03        |
| GO:0039702 Viral Budding via Host ESCRT Complex | 17.2           | 5.30E-03        | 2.20E-02        |
| GO:0019068 Virion Assembly                      | 10.3           | 1.10E-02        | 2.40E-01        |

Supplemental Table II. Down-regulated differentially expressed nervous system gene sets in earlier-onset diverticulitis patients.

| <b>Gene Set</b>                                                    | <b>Combined Score</b> | <b><i>P</i>-value</b> | <b><i>q</i>-value</b> |
|--------------------------------------------------------------------|-----------------------|-----------------------|-----------------------|
| GO:0007416 Synapse Assembly                                        | 107.1                 | 3.15E-12              | 2.16E-08              |
| GO:0035545 Determination of Left/Right Asymmetry in Nervous System | 92.9                  | 5.13E-11              | 1.76E-07              |
| GO:0022008 Neurogenesis                                            | 88.7                  | 2.19E-10              | 2.15E-07              |
| GO:0007417 Central Nervous System Development                      | 83.3                  | 3.51E-09              | 2.41E-06              |
| GO:0007399 Nervous System Development                              | 83.3                  | 1.82E-10              | 2.15E-07              |
| GO:0061548 Ganglion Development                                    | 83.2                  | 1.82E-10              | 2.15E-07              |
| GO:0007421 Stomatogastric Nervous System Development               | 83.2                  | 1.82E-10              | 2.15E-07              |
| GO:0048483 Autonomic Nervous System Development                    | 79.6                  | 2.09E-10              | 2.15E-07              |
| GO:0007422 Peripheral Nervous System                               | 78.1                  | 8.01E-10              | 6.88E-07              |
| GO:0021915 Neural Tube Development                                 | 85.9                  | 1.34E-09              | 1.02E-06              |

Supplemental Table III. Smooth muscle pathways associated with DVT-MO, DVT-LO, and DVT-EO.

DVT-MO down-regulated

|                                                      | p value     | adjusted p value | z score | combined score |
|------------------------------------------------------|-------------|------------------|---------|----------------|
| regulation of smooth muscle contraction (GO:0006940) | 0.00001157  | 0.00672          | -2.85   | 32.36          |
| muscle contraction (GO:0006936)                      | 0.000001159 | 0.001682         | -2.75   | 37.62          |
| smooth muscle contraction (GO:0006939)               | 0.000002708 | 0.00262          | -2.93   | 37.6           |

DVT-LO up-regulated

|                                                      | p value     | adjusted p value | z score | combined score |
|------------------------------------------------------|-------------|------------------|---------|----------------|
| regulation of smooth muscle contraction (GO:0006940) | 0.000008468 | 0.005904         | -2.85   | 33.33          |
| muscle contraction (GO:0006936)                      | 0.000008009 | 0.005904         | -2.75   | 32.28          |
| smooth muscle contraction (GO:0006939)               | 0.0000167   | 0.009315         | -2.93   | 32.22          |

DVT-EO Up-regulated

|                                                      | p value   | adjusted p value | z score | combined score |
|------------------------------------------------------|-----------|------------------|---------|----------------|
| regulation of smooth muscle contraction (GO:0006940) | 0.0002198 | 0.03422          | -2.77   | 23.33          |
| muscle contraction (GO:0006936)                      | 0.0004633 | 0.06011          | -2.72   | 20.85          |
| smooth muscle contraction (GO:0006939)               | 0.0007706 | 0.08996          | -2.89   | 20.74          |

Supplemental Table IV. Patient demographics by cluster.

|                                                 | <b>DVT-MO</b> | <b>DVT-LO</b> | <b>DVT-EO</b> | <b>P-value</b> |
|-------------------------------------------------|---------------|---------------|---------------|----------------|
| <b>Total n</b>                                  | 12            | 6             | 8             |                |
| <b>Sex</b>                                      |               |               |               |                |
| Male                                            | 4 (33.3%)     | 3 (50.0%)     | 5 (62.5%)     | 0.471          |
| Female                                          | 8 (66.7%)     | 3 (50.0%)     | 3 (37.5%)     |                |
| <b>Smoking Status at the Time of Surgery</b>    |               |               |               |                |
| Positive                                        | 6 (50.0%)     | 4 (66.7%)     | 4 (50.0%)     | 0.778          |
| Negative                                        | 6 (50.0%)     | 2 (33.3%)     | 4 (50.0%)     |                |
| <b>Age of First Diverticulitis Episode, yrs</b> |               |               |               |                |
| (mean±SD)                                       | 62.3±18.9     | 66.0±11.7     | 36.3±5.2      | 0.0008         |
| <b>Age of Sigmoid Resection, yrs</b>            |               |               |               |                |
| (mean±SD)                                       | 66.2±16.3     | 66.6±12.6     | 41.3±7.3      | 0.0008         |
| <b>Body Mass Index, kg/m<sup>2</sup></b>        |               |               |               |                |
| (mean±SD)                                       | 33.4±6.9      | 30.1±4.3      | 27.4±6.0      | 0.117          |
| <b>Familial Diverticular Disease</b>            |               |               |               |                |
| Yes                                             | 4 (33.3%)     | 1 (16.7%)     | 3 (37.5%)     | 0.749          |
| No                                              | 8 (66.7%)     | 5 (83.3%)     | 5 (62.5%)     |                |
| <b>History of Perforation/Abscess</b>           |               |               |               |                |
| Yes                                             | 7 (58.3%)     | 4 (66.7%)     | 4 (33.3%)     | 0.445          |
| No                                              | 5 (41.7%)     | 2 (33.3%)     | 8 (66.7%)     |                |
| <b>History of Fistula</b>                       |               |               |               |                |
| Yes                                             | 4 (33.3%)     | 4 (66.7%)     | 1 (12.5%)     | 0.159          |
| No                                              | 8 (66.7%)     | 2 (33.3%)     | 7 (87.5%)     |                |

Positive smoking status includes current and former smokers at the time of surgery. Continuous variables were analyzed by two-tailed one-way ANOVA. Categorical variables were analyzed by two-tailed Fisher's Exact test.
